# Supplementary material for: Pharmacogenomic profiling reveals molecular features of chemotherapy resistance in IDH wild-type primary glioblastoma
Source: PubMed Central journal article supplement (PMC10010007; doi:10.1186/s13073-023-01165-8), 2023-03-13
Supplement: 13073_2023_1165_MOESM2_ESM.pdf [file 13073_2023_1165_MOESM2_ESM.pdf]

## Supplementary Figures

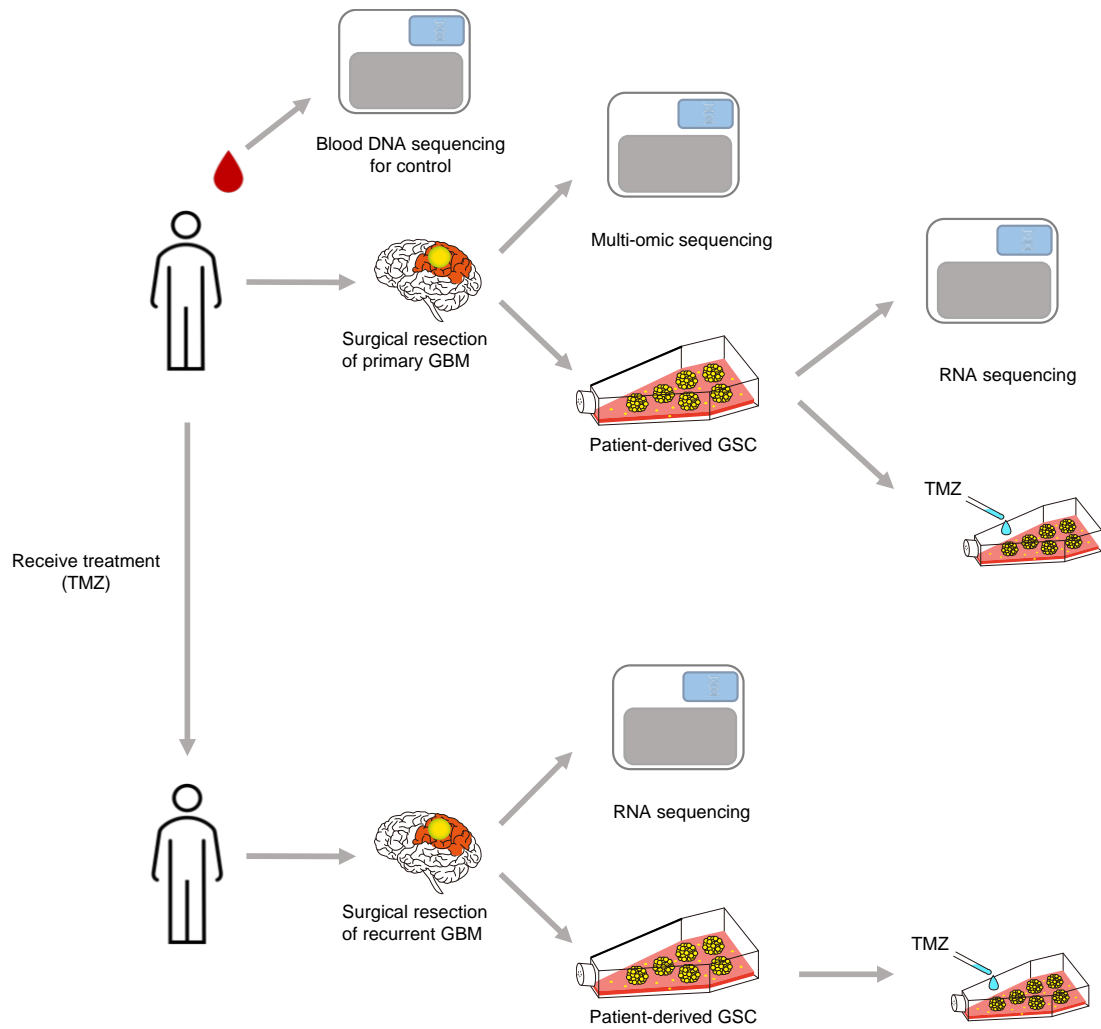

**Fig. S1. Timeline of sample acquisition, sequencing, in vitro culture and TMZ screening.**

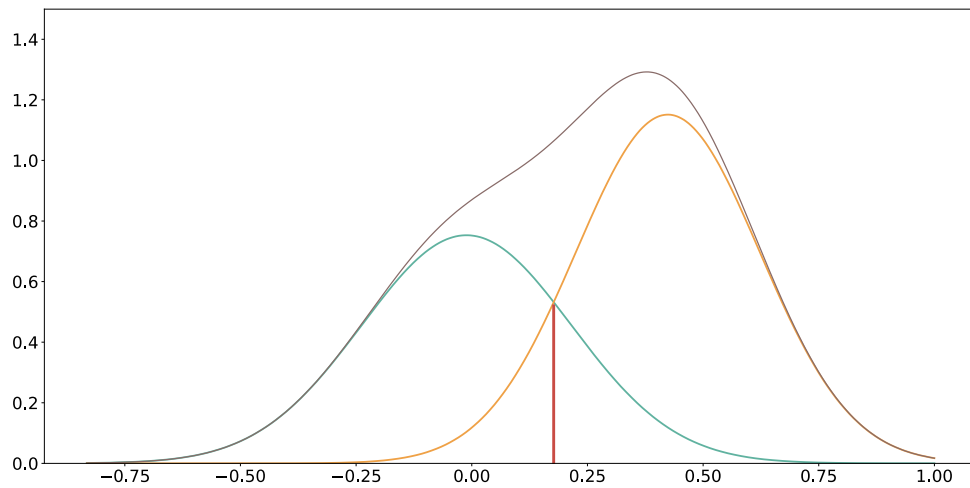

**Fig. S2. Gaussian Mixture Model used to identify genes with the same expression profile between patient-derived cells (PDCs) and tumor tissues.** Spearman's rank correlation coefficients of all genes ( $n = 20,956$ ) between matched GSCs and tumor tissues of 12 patients from the main cohort is shown on the x-axis. Normalized probability density is denoted on the y-axis. The two weighted gaussian components are shown in green and orange curves. The intersection of the two gaussians is shown (red line) to denote the cutoff ( $> 0.177$ ) of Spearman's rank correlation coefficients with higher probability in the gaussian component of positive correlation (orange curve). The overall distribution is shown as a black curve.

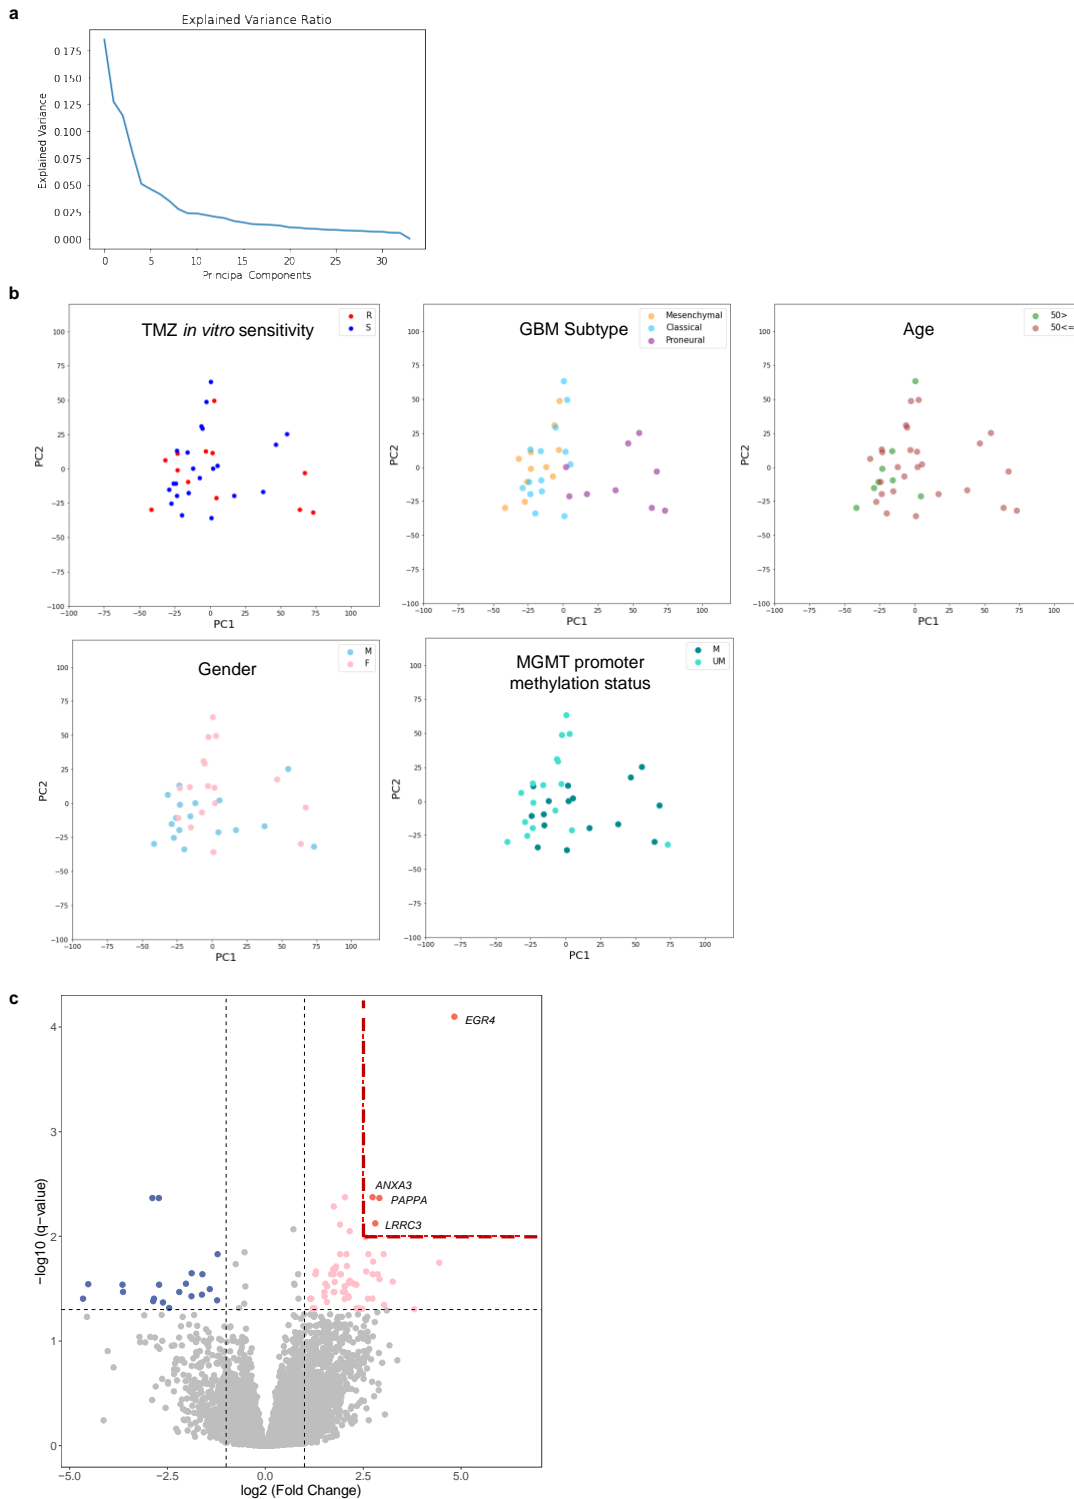

**Fig. S3. Principal Component Analysis and differentially expressed gene analysis on 34 tissue RNA-seq samples.** **a** Principal components and explained variance on 34 RNA-seq samples from the main cohort. Conserved genes were used as feature input. **b** PCA plots with principal component 1 (PC1) and principal component 2 (PC2) on 34 tissue RNA-seq samples colored by annotated categories. R, TMZ-resistant; S, TMZ-sensitive; M, male; F, female; M, methylated; UM, unmethylated. **c** Volcano plot showing the differentially expressed genes from DESeq2 analysis. Black dashed lines are less stringent cut-offs ( $|\log_2 \text{fold change}| > 1$ , adjusted  $P < 0.05$ ) to show the distribution of other potential DEGs (pink, TMZ-resistant up-regulated genes; blue, TMZ-sensitive up-regulated genes). Red dashed lines are the stringent cut-off we used ( $\log_2 \text{fold change} > 2.5$ , adjusted  $P < 0.01$ ) to define 4 TMZ-resistant marker genes (red).

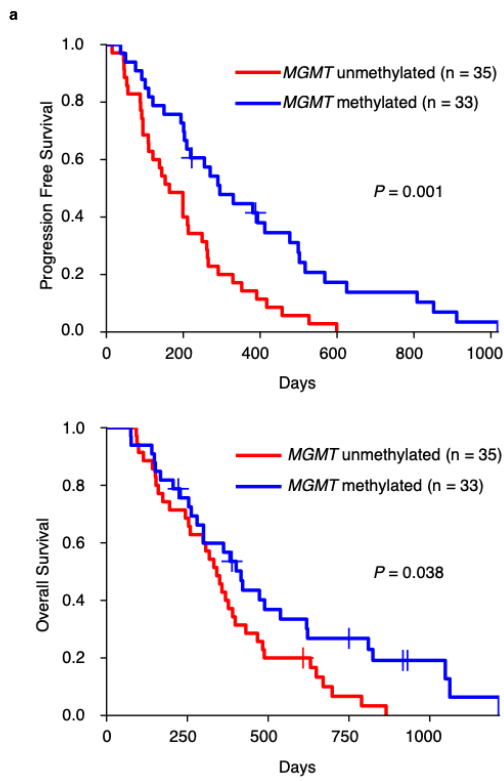

**b**

Fisher exact  $P = 0.0156$

|                      |              | In vitro TMZ Screening |           |
|----------------------|--------------|------------------------|-----------|
|                      |              | Resistant              | Sensitive |
| MGMT promoter status | Unmethylated | 20                     | 15        |
|                      | Methylated   | 9                      | 24        |

**Fig. S4. Association of MGMT promoter methylation status to survival and *in vitro* TMZ screening in the main cohort.** **a** Progression free survival (upper panel) and overall survival (bottom panel) of the *MGMT* unmethylated (red) and *MGMT* methylated (blue) patients in the main cohort (n = 68). **b** Fisher's exact test contingency table for *In vitro* TMZ sensitivity and *MGMT* promoter status association in the main cohort.

| <i>CDK4</i><br>(0.5, 1.58, 1.0) |      | WES  |      |     |
|---------------------------------|------|------|------|-----|
|                                 |      | norm | gain | amp |
| GS                              | norm | 12   | 0    | 0   |
|                                 | gain | 0    | 1    | 0   |
|                                 | amp  | 0    | 0    | 4   |

| <i>MDM2</i><br>(0.5, 1.58, 0.66) |      | WES  |      |     |
|----------------------------------|------|------|------|-----|
|                                  |      | norm | gain | amp |
| GS                               | norm | 14   | 1    | 0   |
|                                  | gain | 0    | 0    | 0   |
|                                  | amp  | 0    | 0    | 2   |

  

| <i>CDKN2A</i><br>(-0.5, -1.58, 0.90) |      | WES  |      |     |
|--------------------------------------|------|------|------|-----|
|                                      |      | norm | loss | del |
| GS                                   | norm | 3    | 1    | 0   |
|                                      | loss | 0    | 3    | 0   |
|                                      | del  | 0    | 0    | 10  |

| <i>PDGFRA</i><br>(0.5, 1.58, 0.67) |      | WES  |      |     |
|------------------------------------|------|------|------|-----|
|                                    |      | norm | gain | amp |
| GS                                 | norm | 15   | 0    | 0   |
|                                    | gain | 0    | 0    | 0   |
|                                    | amp  | 0    | 0    | 2   |

  

| <i>EGFR</i><br>(0.3, 1.58, 0.78) |      | WES  |      |     |
|----------------------------------|------|------|------|-----|
|                                  |      | norm | gain | amp |
| GS                               | norm | 3    | 3    | 0   |
|                                  | gain | 0    | 3    | 0   |
|                                  | amp  | 0    | 0    | 8   |

| <i>PTEN</i><br>(-0.5, -1.58, 0.53) |      | WES  |      |     |
|------------------------------------|------|------|------|-----|
|                                    |      | norm | loss | del |
| GS                                 | norm | 6    | 2    | 0   |
|                                    | loss | 1    | 7    | 1   |
|                                    | del  | 0    | 0    | 0   |

  

| All Genes<br>(avg. F- score = 0.90) |              | WES  |              |            |
|-------------------------------------|--------------|------|--------------|------------|
|                                     |              | norm | loss or gain | del or amp |
| GS                                  | norm         | 53   | 6            | 0          |
|                                     | loss or gain | 1    | 14           | 1          |
|                                     | del or amp   | 0    | 0            | 26         |

**Fig. S5. Copy number estimation by GliomaSCAN.** The tables show number of copy number altered samples estimated by WES and GliomaSCAN. A total of 17 samples that had both WES and GliomaSCAN data was used in the tables. Three numbers presented in the parenthesis indicate the cut-offs for copy number score from GliomaSCAN to distinguish normal from gain/loss (cut-off-1) and gain/loss from amplification/deletion (cut-off-2). The last number shown is the average F-score calculated by cut-off-1 and cut-off-2. Note that for copy number loss or deleted genes, -0.5 and -1.58 log<sub>2</sub> ratio of tumor and normal were used as cut-off-1 and cut-off-2 for both WES and GliomaSCAN data, and 0.5 and 1.58 were used as cut-off-1 and cut-off-2 for copy number gain or amplified genes. But in the case of EGFR, GliomaSCAN's copy number result was less accurate and therefore 0.3 and 1.58 were used as cut-offs to increase compatibility with WES results. The cut-offs were used to determine the copy number alteration status of those without WES. The last table shows combined prediction for all six genes.

| <i>CDK4</i><br>(0.62, 0.92, 0.82) |      | WES  |      |     |
|-----------------------------------|------|------|------|-----|
|                                   |      | norm | gain | amp |
| RNA                               | norm | 31   | 2    | 0   |
|                                   | gain | 0    | 1    | 0   |
|                                   | amp  | 0    | 0    | 4   |

| <i>MDM2</i><br>(0.75, 0.9, 1.0) |      | WES  |      |     |
|---------------------------------|------|------|------|-----|
|                                 |      | norm | gain | amp |
| RNA                             | norm | 34   | 0    | 0   |
|                                 | gain | 0    | 2    | 0   |
|                                 | amp  | 0    | 0    | 2   |

| <i>CDKN2A</i><br>(0.17, 0.76, 0.60) |      | WES  |      |     |
|-------------------------------------|------|------|------|-----|
|                                     |      | norm | loss | del |
| RNA                                 | norm | 4    | 0    | 0   |
|                                     | loss | 4    | 6    | 7   |
|                                     | del  | 2    | 1    | 14  |

| <i>PDGFRA</i><br>(0.79, 0.79, 0.66) |      | WES  |      |     |
|-------------------------------------|------|------|------|-----|
|                                     |      | norm | gain | amp |
| RNA                                 | norm | 35   | 0    | 0   |
|                                     | gain | 0    | 0    | 0   |
|                                     | amp  | 0    | 0    | 3   |

| <i>EGFR</i><br>(0.58, 0.98, 0.74) |      | WES  |      |     |
|-----------------------------------|------|------|------|-----|
|                                   |      | norm | gain | amp |
| RNA                               | norm | 7    | 2    | 0   |
|                                   | gain | 2    | 9    | 2   |
|                                   | amp  | 0    | 4    | 12  |

| <i>PTEN</i><br>(0.98, 1.0, 0.57) |      | WES  |      |     |
|----------------------------------|------|------|------|-----|
|                                  |      | norm | loss | del |
| RNA                              | norm | 14   | 1    | 3   |
|                                  | loss | 2    | 17   | 1   |
|                                  | del  | 0    | 0    | 0   |

| All Genes<br>(avg. F- score = 0.82) |              | WES  |              |            |
|-------------------------------------|--------------|------|--------------|------------|
|                                     |              | norm | loss or gain | del or amp |
| RNA                                 | norm         | 125  | 5            | 3          |
|                                     | loss or gain | 8    | 35           | 10         |
|                                     | del or amp   | 0    | 5            | 35         |

**Fig. S6. Copy number estimation by RNA-seq.** The tables show number of copy number altered samples estimated by WES and RNA-seq. Total of 38 samples with both WES and RNA-seq data was used. Three numbers presented in the parenthesis indicate the cut-offs for copy number score from RNA-seq to distinguish normal from gain/loss (cut-off-1) and gain/loss from amplification/deletion (cut-off-2). The last number shown is the average F-score calculated by cut-off-1 and cut-off-2. These cut-offs were used to determine the copy number alteration status of those without WES. The last table shows combined prediction for all six genes.

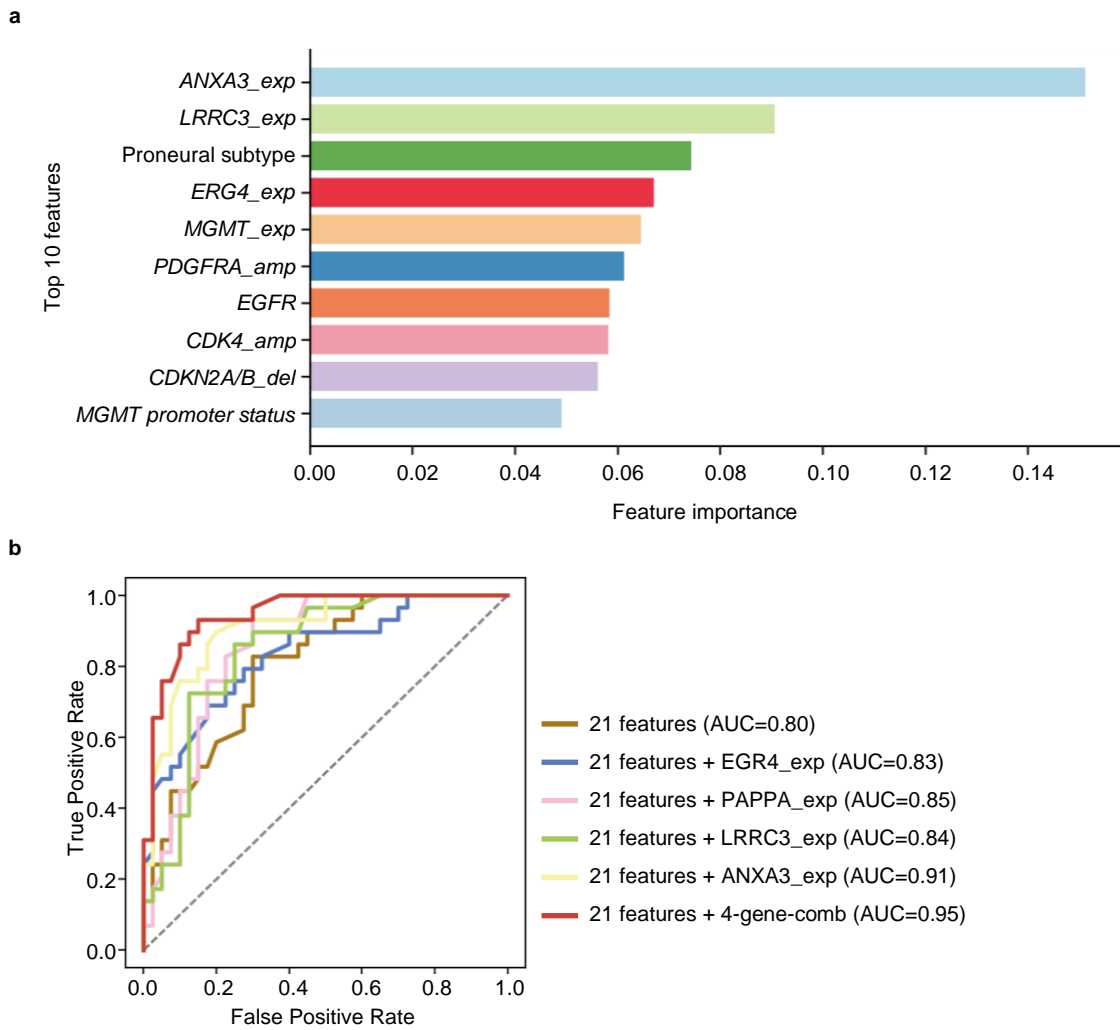

**Fig. S7. Machine learning model feature importance. a** Top 10 feature importance in the model. **b** ROC curves showing the combinatorial contribution of 4 TMZ-Resistant markers. 21 features without adding 4 TMZ-Resistant expression markers (*EGR4*, *PAPP A*, *LRRC3*, *ANXA3*, shown in **Fig. 4a**). 4-gene-comb denotes the combination of the 4 expression markers.

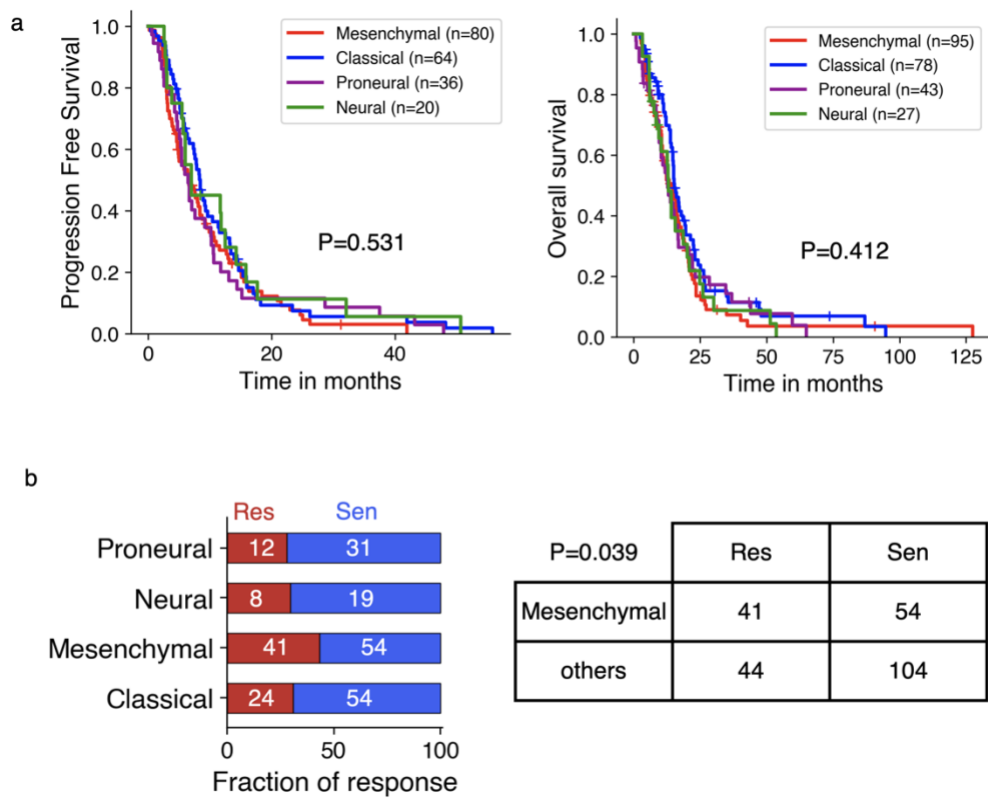

**Fig. S8. Correlations between GBM subtypes and TMZ response.** **a** Survival curves of TCGA IDH-wt, TMZ treated primary GBM samples separated by four GBM subtypes. P-value was computed via multivariate log-rank test. The four GBM subtypes are from Verhaak *et al.*<sup>20</sup>. **b** Distribution of the GBM subtypes in the TCGA cohort by TMZ response predicted from the machine learning model.



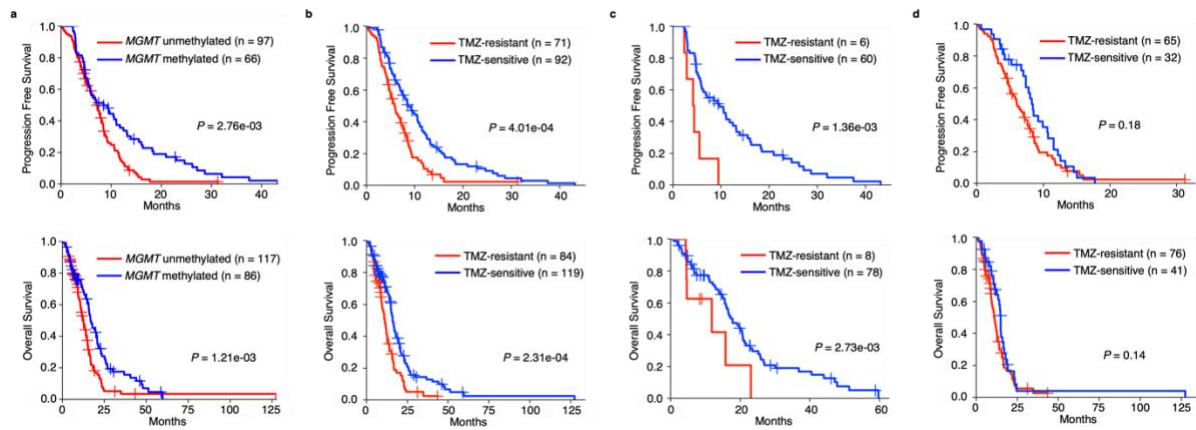

**Fig. S9. Comparison of survival prediction in TCGA cohort.** Kaplan-Meier survival curves of 203 MGMT status available, IDH-wt, TMZ treated, primary GBM samples from TCGA grouped by **a** MGMT promoter methylation status and **b** machine learning model. **c** Kaplan-Meier survival curves of MGMT methylated TCGA samples grouped by machine learning model. **d** Kaplan-Meier survival curves of MGMT unmethylated TCGA samples grouped by machine learning model.

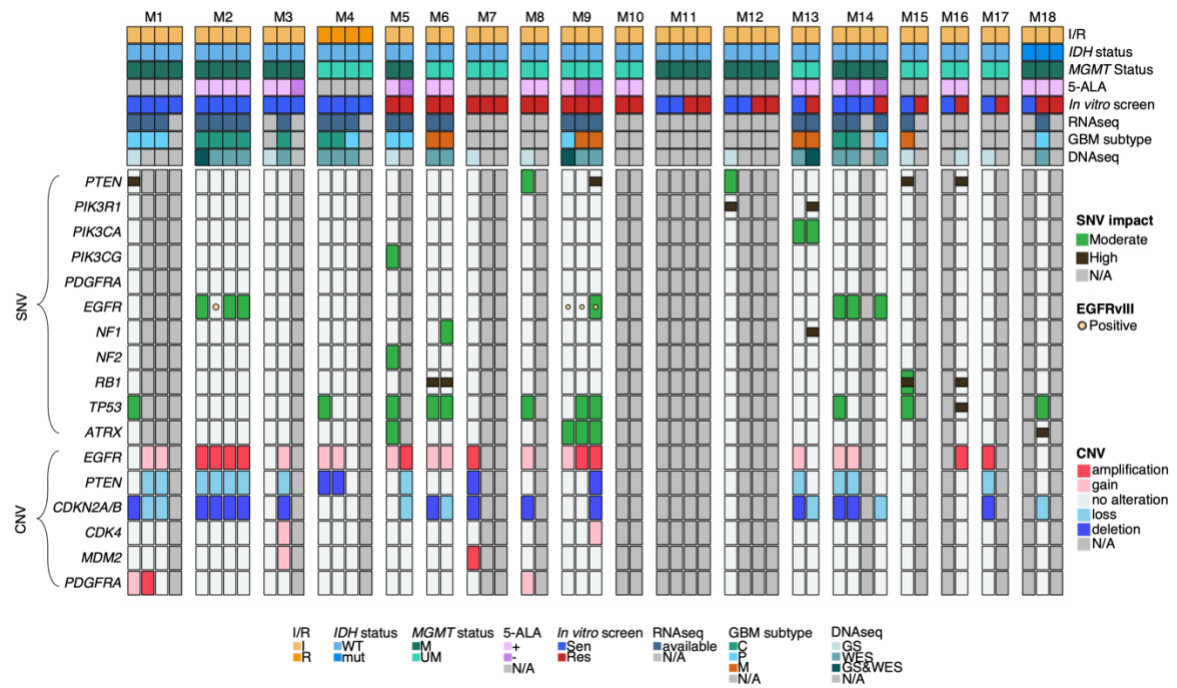

**Fig. S10. Genomic landscape of multi-sector samples.** I, initial tumor; R, recurrent tumor; WT, wild-type; mut, mutant; M, methylated; UM, unmethylated; N/A, not available; Sen, TMZ-sensitive; Res, TMZ-resistant; C, classical; P, proneural; M, mesenchymal; GS, GliomaSCAN; Moderate: Missense or Inframe deletion; High: Frameshift, Stop gained, Splice donor or Splice acceptor.

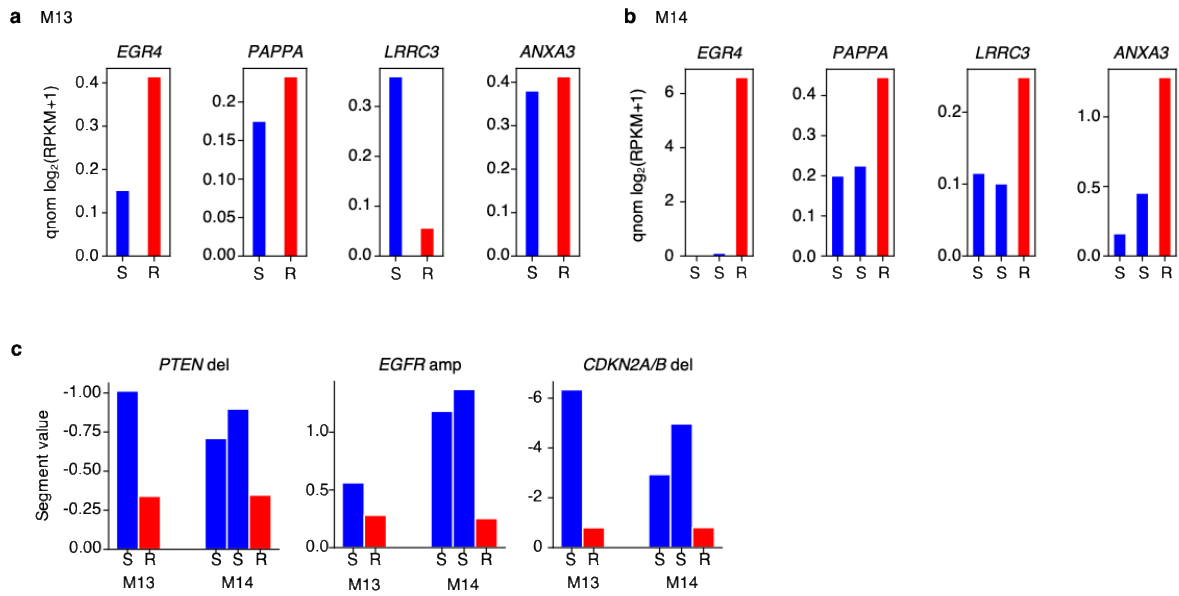

**Fig. S11. TMZ-resistant marker expression and CNV comparison in patient M13 and M14. a,b** Gene expression comparison of TMZ-Resistant marker genes in multi-sector samples of (a) patient M13 and (b) patient M14. **c** Segment value comparison of TMZ-sensitive and TMZ-resistant samples within patient. Blue, expression level in TMZ-Sensitive samples; red, expression level in TMZ-Resistant samples. S, TMZ-sensitive; R, TMZ resistant.

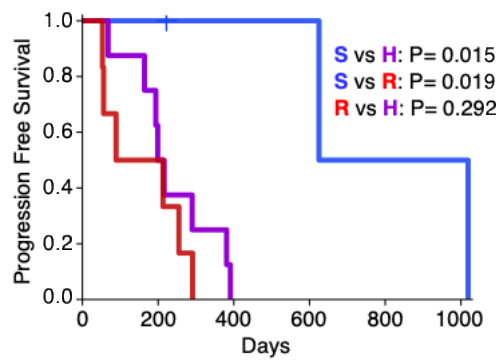

**Fig. S12. Progression free survival difference in patients with multi-sector samples.** S, all sensitive (M1~M3); H, heterogeneous (M11~M18); R, all resistant (M5~M10). P-values calculated by logrank test.
